# Supplementary material for: Unraveling the genetic basis of the causal association between inflammatory cytokines and osteonecrosis
Source: Front Endocrinol (Lausanne). 2024 Apr 29;15:1344917. doi: 10.3389/fendo.2024.1344917 (PMC11091469; doi:10.3389/fendo.2024.1344917)
Supplement: Supplementary file 1 [file Table_1.xlsx]

## Sheet: Sheet1
Table S1.Detailed information of the studies and datasets used in the present study
Exposures/Outcomes	Study/consortium	Participants	Available website
Cytokines	YFS, FINRISK1997, FINRISK2002	8,293 Finns	https://www.finngen.fi/fi
Osteonecrosis	NA	604 Europeans	Trait: Osteonecrosis - IEU OpenGWAS project (mrcieu.ac.uk)
Drug-induced osteonecrosis	NA	101 Europeans	Trait: Osteonecrosis due to drugs - IEU OpenGWAS project (mrcieu.ac.uk)
